# Supplementary material for: Exploring Genetic Determinants: A Comprehensive Analysis of Serpin B Family SNPs and Prognosis in Glioblastoma Multiforme Patients
Source: MDPI journal article supplement (doi:10.3390/cancers16061112), 2024-03-10
Supplement: s1 [file s1]

**TITLE OF RESEARCH STUDY:**

**Exploring Genetic Determinants: A Comprehensive Analysis of SerpinB Family SNPs and Prognosis in Glioblastoma Multiforme Patients**

Please answer the following questions by ticking the response that applies

1. I have read the Information Sheet for this study and have had details of the study explained to me.

**YES**      **NO**  
☐      ☐

2. My questions about the study have been answered to my satisfaction and I understand that I may ask further questions at any point.

**YES**      **NO**  
☐      ☐

3. I understand that I am free to withdraw from the study within the time limits outlined in the Information Sheet, without giving a reason for my withdrawal or to decline to answer any particular questions in the study without any consequences to my future treatment by the researcher.

**YES**      **NO**  
☐      ☐

4. I agree to provide information to the researchers under the conditions of confidentiality set out in the Information Sheet.

**YES**      **NO**  
☐      ☐

5. I wish to participate in the study under the conditions set out in the Information Sheet.

**YES**      **NO**  
☐      ☐

6. I consent to the information collected for the purposes of this research study, once anonymized (so that I cannot be identified), to be used for any other research purposes.

**YES**      **NO**  
☐      ☐



**Participant's Signature:** \_\_\_\_\_  
**Date:** \_\_\_\_\_

**Participant's Name (Printed):** \_\_\_\_\_

**Contact details:** \_\_\_\_\_

**Researcher's Name (Printed):** Sohaib M. Al-Khatib

**Researcher's Signature:** \_\_\_\_\_

**Researcher's contact details:**

**Sohaib M. Al-Khatib, M.D.**

**Associate Professor**

**Department of Pathology and Laboratory Medicine.**

**Jordan University of Science and Technology**

**E-mail: smkhatib4@just.edu.jo**

Please keep your copy of the consent form and the information sheet together.
